# Supplementary material for: Monolayer Ti2C MXene: manipulating magnetic properties and electronic structures by an electric field
Source: Royal Society of Chemistry journal article supplement (doi:10.1039/d0cp00507j), 2020-01-01
Supplement: d0cp00507j1.pdf [file d0cp00507j1.pdf]

## Supplementary Information

# Monolayer $\text{Ti}_2\text{C}$ MXene: Manipulating Magnetic Property and Electronic Structures by Electric Field

Peng Lv<sup>†</sup>, Yan-Li Li<sup>†,\*</sup>, Jia-Fu Wang<sup>†</sup>

<sup>†</sup>Department of Physics, School of Science, Wuhan University of Technology, Wuhan, Hubei 430070, China

\***E-mail:** liyanli128@whut.edu.cn.

**Figure S1:** The band structures, total density of states (TDOS) and PDOS of Ti atoms, C atoms and 3*d*-orbitals of Ti atoms in (a) NM, (b) FM, (c) A-AFM, (d) C-AFM and (e) G-AFM states.

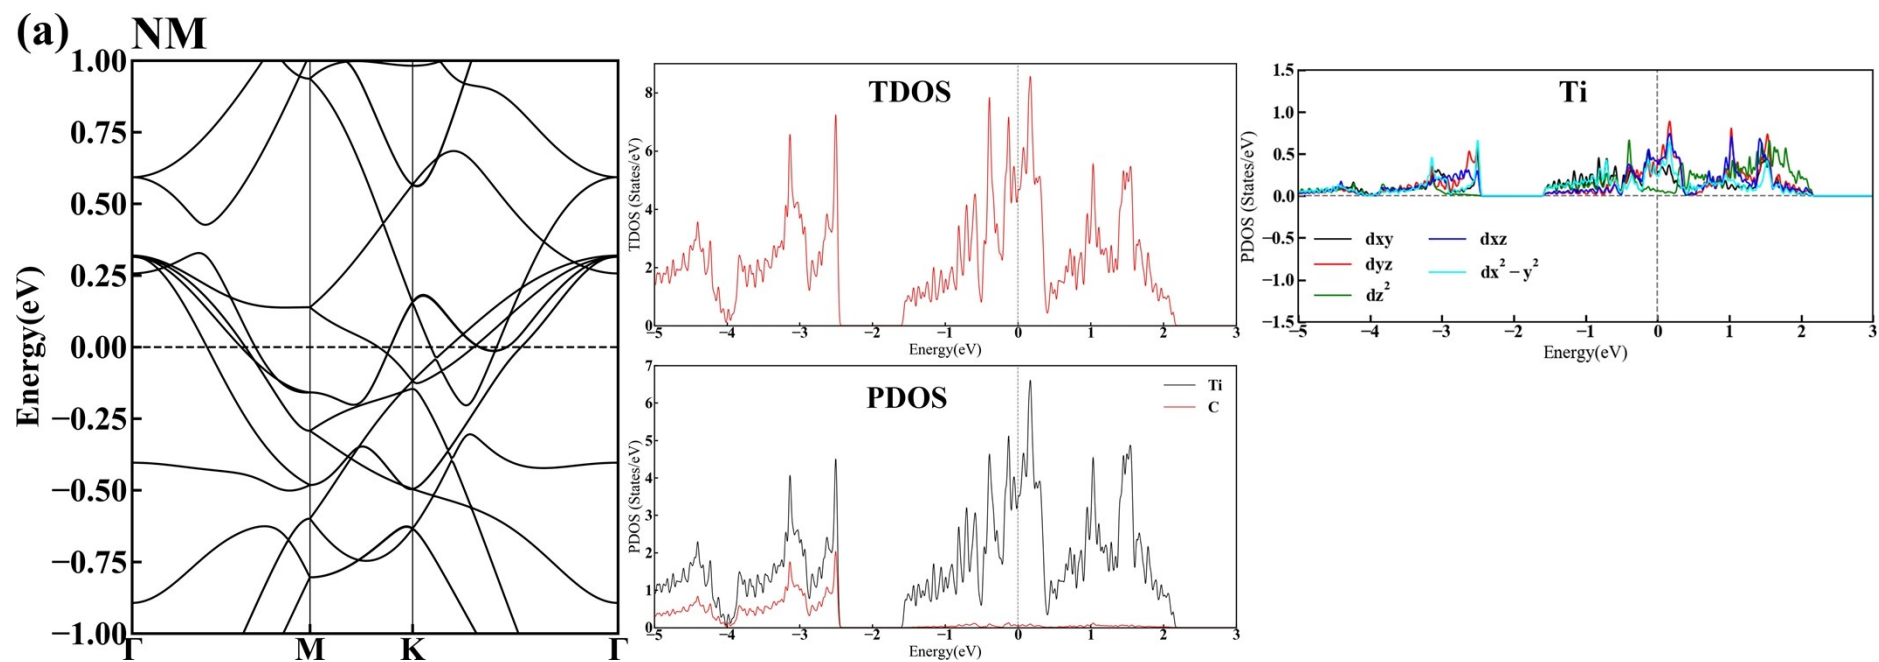

(b) FM

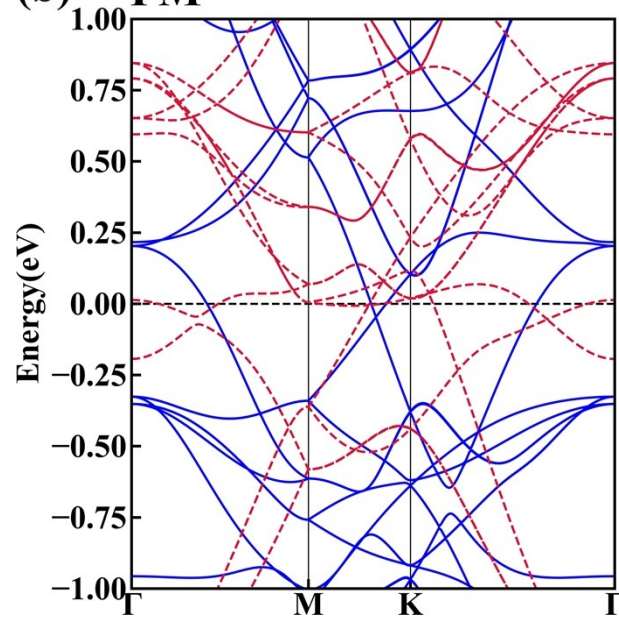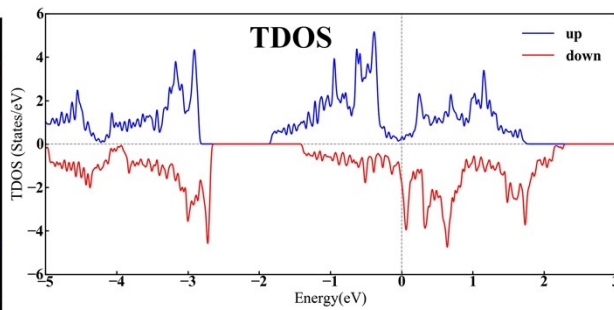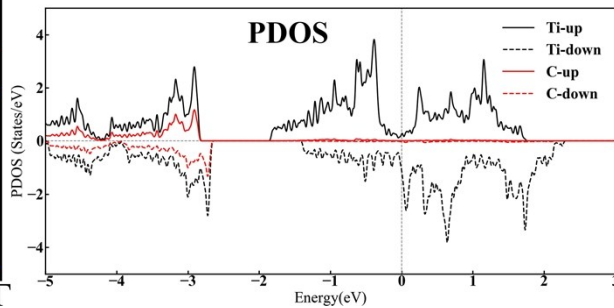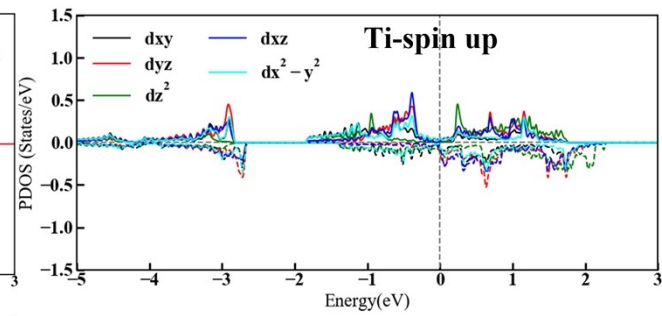

**(c) A-AFM**

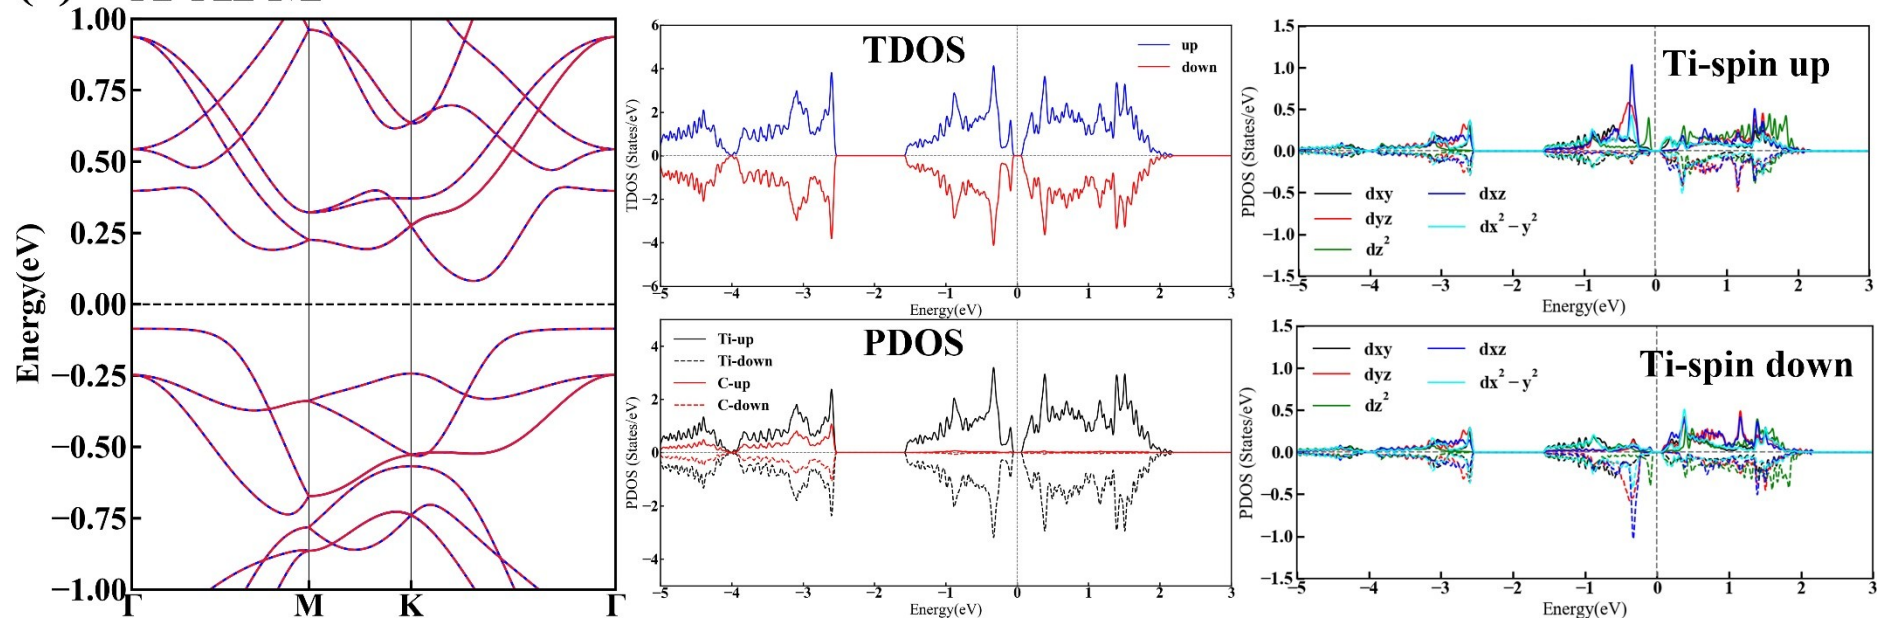

**(d) C-AFM**

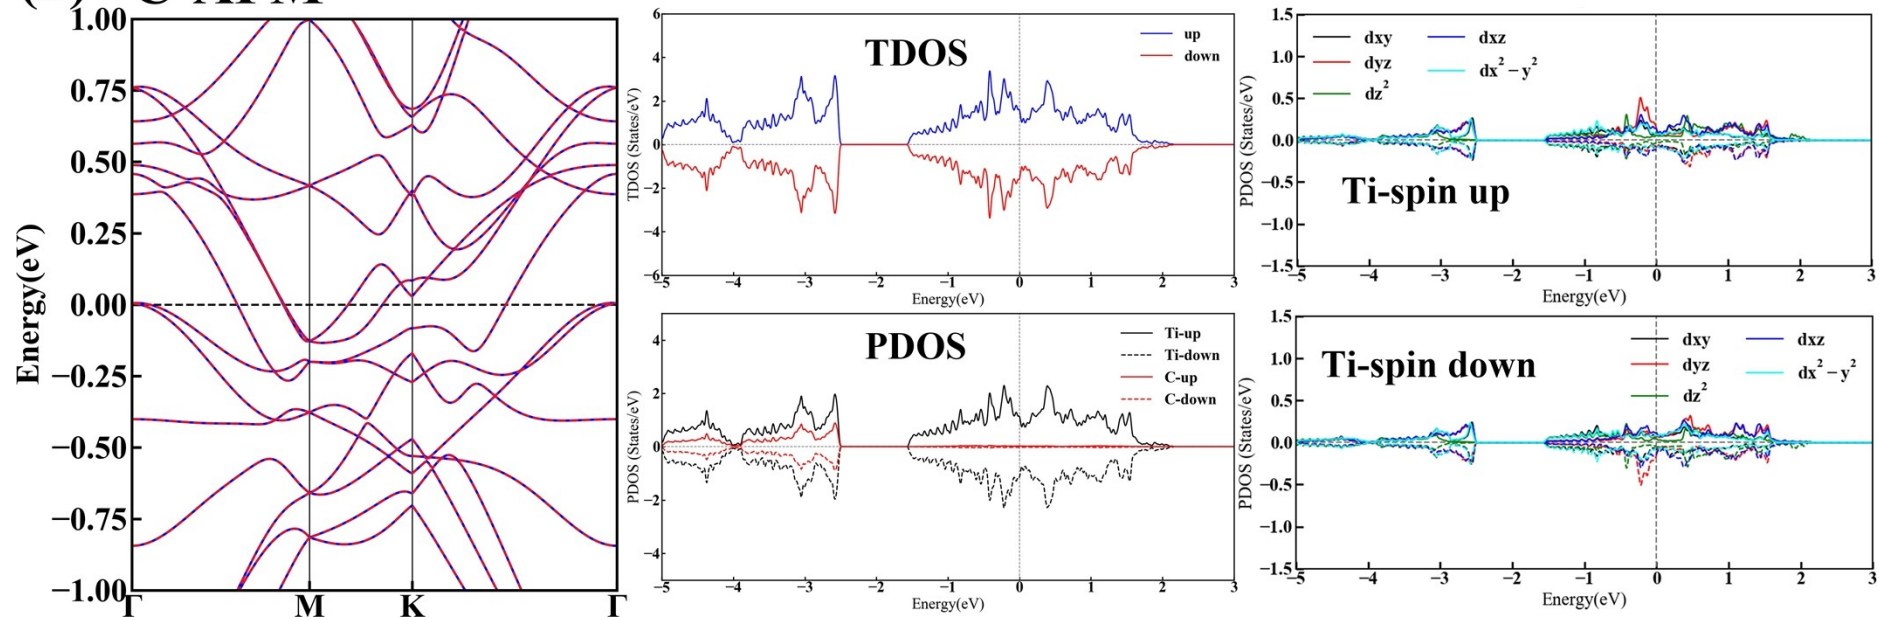

**(e) G-AFM**

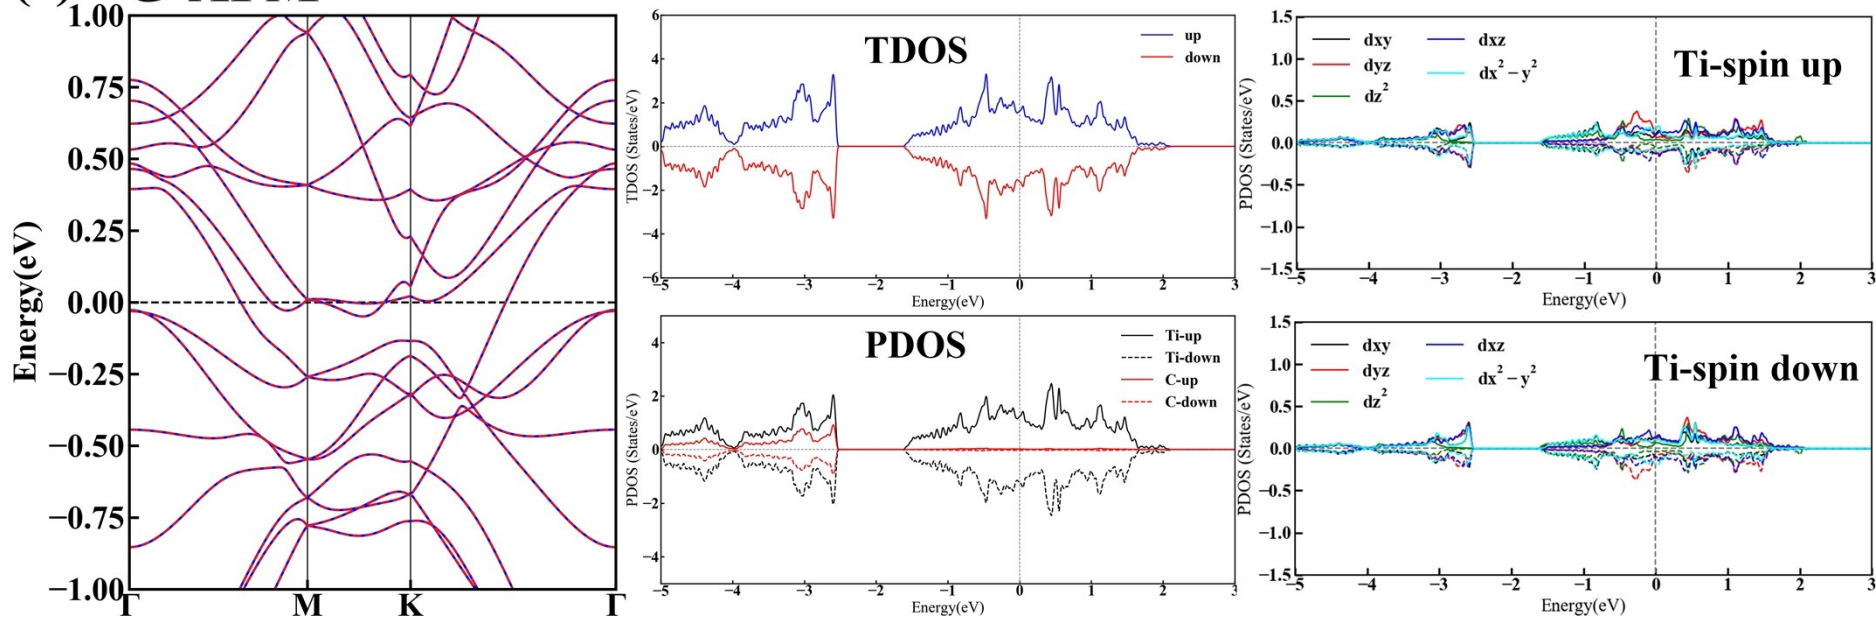

**Table S1.** The exchange parameters ( $J_1$ ,  $J_2$  and  $J_3$ ) under different electric field.

| Electric field ( $E_{\perp}$ )<br>(V/Å) | $J_1$<br>(meV) | $J_2$<br>(meV) | $J_3$<br>(meV) |
|-----------------------------------------|----------------|----------------|----------------|
| 0                                       | -2.35          | 5.95           | -0.35          |
| 0.06                                    | -1.95          | 5.65           | -0.5           |
| 0.1                                     | -1.65          | 4.65           | -0.4           |
| 0.12                                    | -1.55          | 3.75           | -0.35          |
| 0.14                                    | -1.35          | 2.6            | -0.4           |
| 0.16                                    | -0.75          | 1.25           | -0.2           |
| 0.18                                    | -0.6           | 0.7            | -0.2           |
| 0.2                                     | -0.15          | 0.15           | 0.05           |
